# Supplementary material for: Thermostratigraphic and Heat Flow Assessment of the South Slave Region in the Northwest Territories, Canada
Source: Preprints.org preprint supplement (doi:10.20944/preprints202405.0565.v1), 2024-05-09
Supplement: Supplementary file 1 [file supplementary]

## Sheet: 116_wells
Source	Well ID	CPA Pretty Well ID	Bot-Hole Latitude	Bot-Hole Longitude	TVD(Depth)	TVD (Depth)	DST	BHT	Tcf Harrison	Tcf Kehle	Tcf Förster a	Tcf Förster b	Temp with Harrison method	Temp with Kehle method	Temp with Förster a method	Temp with Förster b method	Geothermal gradient	Geothermal gradient Harrison	Geothermal gradient Kehle	Geothermal gradient Förster a	Geothermal gradient Förster b	Paleoclimate temperature correction	Corrected geothermal gradient	Corrected geothermal gradient Harrison	Corrected geothermal gradient Kehle	Corrected geothermal gradient Förster a	Corrected geothermal gradient Förster b
			(NAD83)	(NAD83)	(m)	(ft)	(°C)	(°C)	(°C)	(°F)	(°C)	(°C)	(°C)	(°C)	(°C)	(°C)	(°C/km)	(°C/km)	(°C/km)	(°C/km)	(°C/km)	(°C)	(°C/km)	(°C/km)	(°C/km)	(°C/km)	(°C/km)
Petrel Robertson Consulting Ltd.	300/C-24-6010-11645/0	PETRO-CANADA N. CAMERON HILLS C-24	60.05352N	116.83554W	974	3195.54		46	-0.94167	12.4559	8.008	9.978	45.0583	52.9199	54.008	55.978	45.0719	44.1051	52.1765	53.2936	55.3162	2.20169		46.3655	49.166	55.5541	57.5767
	300/H-34-6010-11645/0	CANSO ET AL N CAMERON HILLS H-34	60.05491N	116.85234W	974.8	3198.16	50										49.1383					2.20245	51.3977
	300/E-69-6010-11645/0	CANSO ET AL N. CAMERON HILLS E-69	60.14016N	116.96468W	912.9	2995.08	46										48.0885					2.14038	50.4331
	300/J-12-6010-11700/0	HB CAMERON RIVER J-12	60.02516N	117.04101W	1054.6	3459.97	48										43.5236					2.27429	45.6802
	300/F-51-6010-11715/0	HB CAMERON HILLS F-51	60.00402N	117.42683W	1542	5059.06	51										31.7121					2.50474	33.3364
	300/M-73-6010-11715/0	STRATEGIC CAMERON M-73	60.04785N	117.49360W	1657	5436.35		50	7.32302	20.7158	16.204	21.589	57.323	61.5088	66.204	71.589	28.9077	33.3271	35.8532	38.6868	41.9366	2.50838		34.8409	32.4775	40.2006	43.4504
	300/I-74-6010-11715/0	STRATEGIC CAMERON I-74	60.06010N	117.47341W	1644	5393.7		49	7.18613	20.5722	16.048	21.368	56.1861	60.429	65.048	70.368	28.528	32.8991	35.4799	38.2895	41.5255	2.50884		34.4252	32.1078	39.8156	43.0516
	300/K-74-6010-11715/0	STRATEGIC CAMERON K-74	60.06141N	117.49233W	1465	4806.43		48	5.22077	18.5358	13.9	18.325	53.2208	58.2977	61.9	66.325	31.3311	34.8947	38.3602	40.8191	43.8396	2.49212		36.5958	35.0487	42.5202	45.5407
	300/C-75-6010-11715/0	STRATEGIC CAMERON C-75	60.06758N	117.48824W	1590	5216.54		50	6.60906	19.9693	15.4	20.45	56.6091	61.0941	65.4	70.45	30.1258	34.2824	37.1032	39.8113	42.9874	2.50841		35.86	33.7469	41.3889	44.565
	300/F-75-6010-11715/0	STRATEGIC CAMERON F-75	60.07494N	117.48780W	1463	4799.87		76	5.19796	18.5125	13.876	18.291	81.198	86.2847	89.876	94.291	50.5126	54.0656	57.5425	59.9973	63.015	2.49168		55.7687	54.2319	61.7004	64.7182
	300/J-04-6010-11730/0	STRATEGIC CAMERON J-04	60.05880N	117.51469W	1449	4753.94		48	5.03778	18.3487	13.708	18.053	53.0378	58.1937	61.708	66.053	31.677	35.1537	38.712	41.1373	44.136	2.48842		36.8711	35.4071	42.8547	45.8533
	300/A-05-6010-11730/0	STRATEGIC CAMERON A-05	60.06738N	117.50902W	1514.6	4969.16		48	5.78041	19.1108	14.4952	19.1682	53.7804	58.6171	62.4952	67.1682	30.305	34.1215	37.3149	39.8753	42.9606	2.50122		35.7729	33.9843	41.5268	44.6121
	300/I-10-6010-11730/0	STRATEGIC CAMERON HILLS I-10	60.16016N	117.49852W	1521.5	4991.8	52										32.7966					2.50221	34.4411
	300/M-49-6010-11730/0	STRATEGIC CAMERON M-49	60.14805N	117.65603W	1505	4937.66		58	5.67299	19.0001	14.38	19.005	63.673	68.5556	72.38	77.005	37.1429	40.9123	44.1566	46.6977	49.7708	2.49974
	300/G-27-6010-11815/0	PAN AM BA A-1 SPAWN G-27	60.10462N	118.32783W	1707.5	5602.03	63										35.6662					2.5046	37.133
	300/J-42-6010-11830/0	HOME KAKISA RIVER J-42	60.02873N	118.63634W	1750	5741.47	48										26.2286					2.49904	27.6566
	300/G-21-6010-11845/0	HOME SILT LAKE SOUTH G-21	60.00706N	118.82434W	1846	6056.43	59										30.8234					2.47906	32.1663
	302/G-21-6010-11845/0	COHO HOME SILT LAKE SOUTH 2G-21	60.00783N	118.82440W	410	1345.14		26									58.2927					1.41569
	300/H-64-6010-11845/0	HOME SILT LAKE H-64	60.05472N	118.94491W	1833	6013.78	53										27.7687					2.48234	29.1229
	300/J-26-6020-11630/0	MURPHY-CANADA ALEXANDRA FALLS NO.2(J-26)	60.25867N	116.57969W	855.3	2806.1		31	-2.60115	10.8951	6.5836	7.9601	28.3988	41.8951	37.5836	60.9601	33.7893	30.7481	46.5276	41.4867	68.8181	2.07762		33.1772	39.3784	43.9158	71.2472
	300/E-02-6020-11730/0	SUNCOR SWEDE E-02	60.19066N	117.52495W	1527	5009.84		46	5.91852	19.2533	14.644	19.379	51.9185	56.6963	60.644	65.379	28.7492	32.6251	35.7539	38.3392	41.4401	2.50295		34.2642	32.4189	39.9784	43.0792
	300/A-52-6020-11730/0	STRATEGIC SWEDE A-52	60.18602N	117.66442W	1610	5282.15		50	6.82438	20.1938	15.64	20.79	56.8244	61.2188	65.64	70.79	29.7516	33.9903	36.7197	39.4658	42.6646	2.50902		35.5487	33.3574	41.0242	44.223
	300/C-22-6020-11745/0	PAN AM ANDEX CAMERON C-22	60.18657N	117.83140W	1615.4	5299.87	50										29.6521					2.50909	31.2053
	300/M-05-6020-11815/0	SUNCOR N CAMERON HILLS M-05	60.24940N	118.28117W	1424.9	4674.87	56										37.8272					2.48213	39.5692
	300/J-72-6030-11530/0	SHELL H.B. GRUMBLER J-72	60.36131N	115.73046W	730.3	2396		28	-4.42014	9.22016	5.0836	5.8351	23.5799	33.1223	33.0836	33.8351	35.4649	29.4124	42.4789	42.4259	43.4549	1.92388		32.0467	39.7441	45.0602	46.0892
	300/F-39-6030-11645/0	MURPHY CANADA ALEXANDRA NO.1(F-39)	60.47419N	116.86079W	956.2	3137.14		32	-1.18631	12.2238	7.7944	9.6754	30.8137	38.791	39.7944	41.6754	31.2696	30.029	38.3717	39.421	41.3882	2.18438		32.3134	35.3773	41.7055	43.6726
	300/L-42-6040-11415/0	CDR WOOD BUFFALO L-42	60.52763N	114.40634W	330.7	1084.97
	300/C-03-6040-11430/0	CDR WOOD BUFFALO C-03	60.53346N	114.51790W	348.1	1142.06
	302/C-03-6040-11430/0	CDR WOOD BUFFALO 2C-03	60.53346N	114.51790W	348	1141.73
	300/C-74-6040-11430/0	CDR WOOD BUFFALO C-74	60.55230N	114.73600W	363	1190.94
	300/D-66-6040-11600/0	NWT ESCARPMENT LAKE NO.2(D-66)	60.58553N	116.21622W	467	1532.15
	300/L-66-6040-11600/0	COMINCO HAY RIVER G-3	60.59540N	116.21804W	635.5	2084.97
	302/L-66-6040-11600/0	NWT ESCARPMENT LAKE NO.1(L-66)	60.59540N	116.21804W	635.5	2084.97		27	-5.84853	7.93067	3.946	4.2235	21.1515	31.4059	30.946	31.2235	39.1817	29.9787	46.1148	45.391	45.8277	1.78949		32.7946	43.5287	48.2069	48.6436
	300/A-77-6040-11600/0	NWT ESCARPMENT LAKE NO.3(A-77)	60.60151N	116.22332W	472.4	1549.87		34									67.5275					1.52255
	300/K-10-6040-11715/0	CALSTAN TATHLINA LAKE K-10	60.66128N	117.27372W	853	2798.56		33	-2.63396	10.8646	6.556	7.921	30.366	39.0359	39.556	40.921	36.2251	33.1372	43.3011	43.9109	45.5111	2.07501		35.5698	40.4115	46.3435	47.9437
	300/D-39-6040-11715/0	SOBC TATHLINA LAKE D-39	60.63372N	117.37364W	980.2	3215.88		33	-0.856807	12.5365	8.0824	10.0834	32.1432	39.9647	41.0824	43.0834	31.5242	30.6501	38.6296	39.7698	41.8113	2.20761		32.9023	35.6136	42.022	44.0635
	300/G-19-6040-11745/0	BRIGGS WEST TATHLINA NO.2(G-19)	60.63836N	117.79234W	1047	3435.04		35	0.0460895	13.4	8.884	11.219	35.0461	42.4444	43.884	46.219	31.4231	31.4671	38.5334	39.9083	42.1385	2.26785		33.6332	35.4617	42.0744	44.3045
	300/G-48-6040-11745/0	BRIGGS WEST TATHLINA LAKE NO.1(G-48)	60.62269N	117.88701W	990.6	3250		33	-0.714861	12.6717	8.2072	10.2602	32.2851	40.0398	41.2072	43.2602	31.1932	30.4716	38.2998	39.4783	41.5508	2.21741		32.71	35.2747	41.7167	43.7892
	300/K-48-6040-11745/0	PLACID WOOD W. TATHLINA K-48	60.62677N	117.89587W	1009.2	3311.02		30	-0.462261	12.9127	8.4304	10.5764	29.5377	37.1737	38.4304	40.5764	27.6457	27.1876	34.754	35.9992	38.1256	2.23455		29.4018	31.713	38.2134	40.3398
	300/K-24-6040-11800/0	CPOG CHEVRON TATHLINA K-24	60.82332N	115.84298W	1051.9	3451.12	40										36.03					2.27201	38.1899
	300/G-43-6050-11545/0	FROBISHER HAY RIVER #4	60.70512N	115.88748W	1949	6394.36
	302/G-43-6050-11545/0	FROBISHER HAY RIVER #5B	60.70624N	115.88748W	270	885.827
	303/G-43-6050-11545/0	FROBISHER HAY RIVER #5	60.70624N	115.88609W	176.5	579.068
	304/G-43-6050-11545/0	FROBISHER HAY RIVER #6	60.70735N	115.88748W	167	547.9
	300/F-29-6050-11630/0	NWT HEART LAKE NO.1(F-29)	60.80512N	116.58640W	535.5	1756.89
	300/C-19-6050-11645/0	NWT DESMARAIS LAKE NO.1(C-19)	60.80011N	116.80140W	796	2611.55
	300/D-50-6050-11700/0	PLACID CHEVRON N.E. TATHLINA D-50	60.81858N	117.15374W	808.2	2651.57	37										43.1824					2.02261	45.685
	300/K-18-6050-11715/0	BRIGGS N.E.TATHLINA LAKE NO.2(K-18)	60.79358N	117.30066W	750.1	2460.96		34	-4.12713	9.48746	5.3212	6.1717	29.8729	39.2708	39.3212	40.1717	42.5277	37.0256	49.5545	49.6217	50.7555	1.94992		39.6251	46.7921	52.2212	53.3551
	300/C-27-6050-11715/0	BRIGGS N.E.TATHLINA LAKE NO.1(C-27)	60.76711N	117.33044W	677.3	2222.11
	300/D-34-6050-11715/0	BRIGGS NORTHEAST TATHLINA LAKE NO.9(D-34)	60.72011N	117.37280W	892.5	2928.15		31	-2.07397	11.3875	7.03	8.5925	28.926	37.3264	38.03	39.5925	32.381	30.0572	39.4693	40.2577	42.0084	2.11871		32.4311	36.5372	42.6316	44.3823
	300/J-53-6050-11715/0	BRIGGS TATHLINA LAKE NO.7(J-53)	60.70928N	117.39669W	843	2765.75		37	-2.77689	10.7316	6.436	7.751	34.2231	42.962	43.436	44.751	41.3998	38.1057	48.4722	49.0344	50.5943	2.06358		40.5536	45.5938	51.4823	53.0422
	300/J-65-6050-11715/0	PLACID CHEVRON KAKISA J-65	60.74511N	117.45335W	926.9	3041.01		36	-1.59224	11.8402	7.4428	9.1773	34.4078	42.5779	43.4428	45.1773	36.5735	34.8557	43.6702	44.6033	46.4746	2.15491		37.1806	40.7035	46.9282	48.7994
	300/F-01-6050-11730/0	BRIGGS TATHLINA LAKE NO.3(F-01)	60.67497N	117.52075W	811.4	2662.07		45	-3.23163	10.3103	6.0568	7.2138	41.7684	50.728	51.0568	52.2138	52.8716	48.8888	59.9309	60.3362	61.7621	2.02645		51.3863	57.0897	62.8337	64.2596
	300/A-71-6050-11730/0	BRIGGS W.TATHLINA LAKE NO.3(A-71)	60.66677N	117.72142W	1040	3412.07		32	-0.0475438	13.31	8.8	11.1	31.9525	39.3944	40.8	43.1	28.75	28.7043	35.86	37.2115	39.4231	2.26184		30.8791	32.7939	39.3864	41.5979
	300/L-69-6050-11830/0	CALSTAN IMPERIAL BOUVIER L-69	60.80954N	118.71802W	1019.6	3345.14	41										38.1522					2.24392	40.353
	300/O-07-6100-11445/0	MCD ET AL SULPHUR POINT NO.1(O-07)	60.94806N	114.76301W	134.2	440.289
	300/B-52-6100-11530/0	HORN RIVER ET AL HAY RIVER B-52	60.85221N	115.66933W	617.8	2026.9	26										38.6857					1.76257	41.5386
	300/G-15-6100-11615/0	GEN. CRUDE RANVIK REEF CREEK G-15	60.90637N	116.29436W	363.6	1192.91	19										46.4796					1.34065	50.1668
	300/I-41-6100-11630/0	NWT HEART LAKE NO.2 (I-41)	60.84387N	116.63031W	502.6	1648.95	42										79.3872					1.57447	82.5198
	300/F-35-6100-11715/0	PAN AMERICAN-SHELL KAKISA F-35	60.90636N	117.36469W	730	2395.01		29	-4.4246	9.2161	5.08	5.83	24.5754	34.1201	34.08	34.83	36.8493	30.7882	43.8631	43.8082	44.8356	1.92348		33.4231	41.1287	46.4431	47.4705
	300/H-36-6100-11715/0	PAN AMERICAN-SHELL KAKISA H-36	60.92303N	117.34906W	762.5	2501.64		30	-3.94456	9.6545	5.47	6.3825	26.0554	35.3636	35.47	36.3825	36.5902	31.417	43.6244	43.7639	44.9607	1.9659		33.9952	40.8453	46.3422	47.5389
	300/I-44-6100-11715/0	PAN AMERICAN-SHELL KAKISA I-44	60.89386N	117.38031W	784.5	2573.82	27		-3.62243	9.95013	5.734	6.7565					31.74					1.99362	34.2812
	300/L-19-6100-11800/0	PAN AMERICAN-SHELL KAKISA L-19	60.97720N	118.06001W	743	2437.66		28	-4.23199	9.39169	5.236	6.051	23.768	33.2176	33.236	34.051	34.8587	29.1629	41.881	41.9058	43.0027	1.94066		31.7748	39.1284	44.5177	45.6146
	300/D-06-6100-11830/0	BRIGGS FOETUS LAKE NO.1 (D-06)	60.91886N	118.52877W	836.9	2745.73	27										29.7527					2.05653	32.21
	300/B-07-6100-11845/0	BRIGGS RABBIT LAKE NO.3(B-07)	60.93552N	118.76315W	815	2673.88		47	-3.17959	10.3584	6.1	7.275	43.8204	52.7547	53.1	54.275	55.092	51.1907	62.153	62.5767	64.0184	2.03076		53.6824	59.3074	65.0684	66.5101
	300/O-16-6100-11845/0	BRIGGS RABBIT LAKE NO.1(O-16)	60.93135N	118.79440W	865	2837.93		26	-2.46306	11.0238	6.7	8.125	23.5369	32.1243	32.7	34.125	27.6301	24.7826	34.7102	35.3757	37.0231	2.08853		27.1971	31.8073	37.7902	39.4376
	300/O-25-6100-11845/0	BRIGGS RABBIT LAKE NO. 2(O-25)	60.91469N	118.82565W	887.5	2911.75
	300/N-06-6100-11915/0	IMP REDKNIFE N-06	60.93135N	119.27097W	1014.1	3327.1
	300/E-33-6100-11915/0	WILKINSON REDKNIFE RIVER NO.2(E-33)	60.87301N	119.37254W	1043.1	3422.24		39	-0.00604929	13.3499	8.8372	11.1527	38.994	46.4166	47.8372	50.1527	35.3753	35.3695	42.4855	43.8474	46.0672	2.26451		37.5405	39.4169	46.0183	48.2381
	300/I-41-6110-11530/0	MCD ET AL HAY RIVER NO.1(I-41)	61.01041N	115.63414W	255.1	836.942
	300/E-72-6110-11615/0	GEN. CRUDE RANVIK CHEVRON DESMARAIS PT. E-72	61.02171N	116.49643W	470.3	1542.98	26										50.8186					1.51892	54.0483
	300/B-69-6110-11630/0	NWT BIG ISLAND NO.1(B-69)	61.13346N	116.70139W	413.6	1356.96
	300/C-38-6110-11645/0	NWT BIG ISLAND NO.2(C-38)	61.11679N	116.86806W	434.9	1426.84
	300/L-10-6110-11730/0	CDR CHEVRON MILLS LAKE L-10	61.16140N	117.52896W	628.3	2061.35	37										55.5467					1.77861	58.3775
	300/A-70-6110-11745/0	CDR CPOG CHEVRON MILLS LAKE A-70	61.15220N	117.94277W	735.7	2413.71	32										40.6416					1.93105	43.2663
	300/K-21-6110-11830/0	BRIGGS NORTHEAST RABBIT LAKE NO.1(K-21)	61.00958N	118.58728W	854.4	2803.15		30	-2.61399	10.8831	6.5728	7.9448	27.386	36.0462	36.5728	37.9448	32.6545	29.5951	39.731	40.3474	41.9532	2.0766		32.0255	36.8398	42.7779	44.3837
	300/C-19-6120-11645/0	NWT DEEP BAY NO.2(C-19)	61.50014N	116.80135W	431.9	1416.99
	300/C-20-6120-11645/0	NWT DEEP BAY NO.4(C-20)	61.53534N	116.80135W	321.5	1054.79
	300/A-40-6120-11645/0	PUNCH DEEP BAY TEST NO.4	61.53534N	116.85135W	186	610.236
	300/D-47-6120-11645/0	NWT DEEP BAY NO.1(D-47)	61.45200N	116.90136W	402.6	1320.87
	300/B-75-6120-11715/0	CDR TRIAD ANDEX ET AL MILLS LAKE B-75	61.23485N	117.47958W	552	1811.02		32									54.1667
	302/I-57-6120-11730/0	CDR CPOG CHEVRON MILLS LAKE 2I-57	61.27713N	117.66136W	588.9	1932.09		27									42.2822
	300/P-18-6120-11800/0	CHEVRON MILLS LAKE P-18	61.29734N	118.03475W	583.4	1914.04		36									58.1076
	302/J-74-6120-11800/0	CDR CPOG CHEVRON MILLS LAKE 2J-74	61.22720N	118.23137W	697.1	2287.07		36	-4.91558	8.77035	4.6852	5.2707	31.0844	40.8724	40.6852	41.2707	48.63	41.5786	55.6196	55.351	56.1909	1.87867		44.2735	52.9336	58.046	58.8859
	300/O-66-6130-11545/0	KORE SULPHUR BAY NO.1(O-66)	61.43153N	115.95135W	48.8	160.105
	300/C-61-6130-11630/0	NWT DEEP BAY NO.3(C-61)	61.33347N	116.70971W	347.5	1140.09
	300/K-33-6130-11645/0	PUNCH DEEP BAY TEST NO.3	61.37514N	116.86803W	405	1328.74
	302/K-33-6130-11645/0	PUNCH DEEP BAY TEST NO.6	61.37514N	116.86803W	355	1164.7
	300/D-57-6130-11700/0	PUNCH DEEP BAY TEST NO.5	61.43347N	117.18471W	373	1223.75
	300/K-31-6130-11730/0	NWT PROVINCE NO.1(K-31)	61.34458N	117.61805W	511.8	1679.13
	300/H-28-6130-11930/0	GULF ET AL REDKNIFE H-28	61.45446N	119.56566W	710.6	2331.36	38										50.5207					1.89728	53.1907
	300/K-45-6140-11700/0	I0E PROVIDENCE K-45	61.57681N	117.14798W	262.4	860.892
	300/I-38-6140-11730/0	HORN RIVER PLACID I0E MINK LAKE I-38	61.62541N	117.59889W	415.1	1361.88	20										43.1221					1.42427	46.5533
	300/J-03-6140-11800/0	CS NOEL LAFERTE RIVER J-03	61.54402N	118.01185W	477.9	1567.91	27										52.103					1.53203	55.3087
	300/I-47-6140-11800/0	CS LAFERTE RIVER I-47	61.61055N	118.13033W	462.4	1517.06
	300/H-27-6140-11830/0	CS LAFERTE RIVER H-27	61.60637N	118.56785W	520.9	1708.99
	300/O-15-6140-11845/0	CS LAFERTE RIVER O-15	61.58137N	118.79440W	594.7	1951.12
	300/I-08-6140-11930/0	HORN R DECALTA TENN ET AL RABBITSKIN I-08	61.62566N	119.50615W	625.8	2053.15		35	-5.99706	7.79787	3.8296	4.0586	29.0029	39.3321	38.8296	39.0586	52.5727	42.9897	59.4953	58.6922	59.0582	1.77481		45.8257	56.9262	61.5283	61.8942
	300/D-66-6140-11945/0	HORN R DECALTA ET AL TROUT D-66	61.58616N	119.97003W	690.4	2265.09		26	-5.01619	8.67934	4.6048	5.1568	20.9838	30.8219	30.6048	31.1568	34.6176	27.352	41.6018	41.2874	42.0869	1.8693		30.0595	38.926	43.9949	44.7945
	300/B-41-6150-11645/0	GPD NOEL MILLS LAKE B-41	61.66839N	116.88940W	419.1	1375	32										71.3434					1.43103	74.7579
	300/C-25-6150-11815/0	CS LAFERTE RIVER C-25	61.73554N	118.33346W	481.9	1581.04
	300/M-16-6150-11830/0	CS LAFERTE RIVER M-16	61.76471N	118.56002W	512.4	1681.1
	300/G-41-6150-11830/0	CS LAFERTE RIVER G-41	61.67304N	118.63816W	503.2	1650.92
	300/A-66-6150-11830/0	CS LAFERTE RIVER A-66	61.75221N	118.69285W	570.3	1871.06
	300/A-21-6200-11745/0	C.S. LAFERTE RIVER A-21	61.83555N	117.81781W	419.1	1375																1.43103
	300/A-36-6200-11745/0	C.S. LAFERTE RIVER A-36	61.91889N	117.84906W	203.1	666.339
	300/G-68-6200-11745/0	CS LAFERTE RIVER G-68	61.95639N	117.95063W	389.2	1276.9
	300/M-02-6200-11815/0	C.S. LAFERTE RIVER M-02	61.86471N	118.27877W	434.3	1424.87
OROGO	300/I-72-6030-11530/0	GRUNBLER I-72	60.3613N	115.7205W	402.95	1322.01	17.2										37.4736					1.40391	40.9577
	300/I-166030-11545/0	GRUNBLER I-16	60.4273N	115.7835W	540.106	1772	32.78										56.8037					1.63786	59.8362
	300/G-386100-11630/0	DESMARAIS NO.1 (G-38)	60.9564N	116.6069W	512.67	1681.99	33.3										60.8579					1.59164	63.9625
	300/C-126110-11715/0	MILLS LAKE C-12	61.0173N	117.3001W	673.61	2210.01	37.2										52.1073					1.84548	54.847
	300/L-716050-11730/0	KAKISA L-71	60.6782N	117.7492W	940.918	3087	37.78										37.9204					2.16916	40.2258
	300/F-466050-11800/0	GULL CREEK F-46	60.7582N	118.1453W	932.993	3061	33.3										33.4408					2.16114	35.7571
	300/A-636050-11800/0	GULL CREEK A-63	60.7004N	118.1959W	916.838	3008	42.2										43.7373					2.1445	46.0763
	300/A-476130-11715/0	PROVIDENCE A-47	61.4374N	117.3771W	504.444	1655		26.67														1.57762

## Sheet: Per _Community
Community	Well ID	CPA Pretty Well ID	TVD(Depth)	TVD (Depth)	DST	BHT	Tcf Harrison	Tcf Kehle	Tcf Förster a	Tcf Förster b	Temp with Harrison method	Temp with Kehle method	Temp with Förster a method	Temp with Förster b method	Geothermal gradient	Geothermal gradient Harrison	Geothermal gradient Kehle	Geothermal gradient Förster a	Geothermal gradient Förster b	Paleoclimate temperature correction	DST Pal	BHT (°C) z<600 m	Temp with Harrison method	Temp with Kehle method	Temp with Förster a method	Temp with Förster b method	Geothermal gradient	Corrected geothermal gradient Harrison	Corrected geothermal gradient Kehle	Corrected geothermal gradient Förster a	Corrected geothermal gradient Förster b
			(m)	(ft)	(°C)	(°C)	(°C)	(°F)	(°C)	(°C)	(°C)	(°C)	(°C)	(°C)	(°C/km)	(°C/km)	(°C/km)	(°C/km)	(°C/km)	(°C)			(°C)	(°C)	(°C)	(°C)	(°C/km)	(°C/km)	(°C/km)	(°C/km)	(°C/km)
Ft. Providence
	300/B-75-6120-11715/0	CDR TRIAD ANDEX ET AL MILLS LAKE B-75	552	1811.02		32									54.1667					1.65759		33.6576					57.1695
	302/I-57-6120-11730/0	CDR CPOG CHEVRON MILLS LAKE 2I-57	588.9	1932.09		27									42.2822					1.71738		28.7174					45.1985
	300/P-18-6120-11800/0	CHEVRON MILLS LAKE P-18	583.4	1914.04		36									58.1076					1.70861		37.7086					61.0364
	302/J-74-6120-11800/0	CDR CPOG CHEVRON MILLS LAKE 2J-74	697.1	2287.07		36	-4.91558	8.77035	4.6852	5.2707	31.0844	40.8724	40.6852	41.2707	48.63	41.5786	55.6196	55.351	56.1909	1.87867			32.9631	42.7511	42.5639	43.1494		44.2735	58.3146	58.046	58.8859
	300/L-10-6110-11730/0	CDR CHEVRON MILLS LAKE L-10	628.3	2061.35	37										55.5467					1.77861	38.7786						58.3775
	300/A-70-6110-11745/0	CDR CPOG CHEVRON MILLS LAKE A-70	735.7	2413.71	32										40.6416					1.93105	33.931						43.2663
	300/I-38-6140-11730/0	HORN RIVER PLACID I0E MINK LAKE I-38	415.1	1361.88	20										43.1221					1.42427	21.4243						46.5533
	300/J-03-6140-11800/0	CS NOEL LAFERTE RIVER J-03	477.9	1567.91	27										52.103					1.53203	28.532						55.3087
	300/B-41-6150-11645/0	GPD NOEL MILLS LAKE B-41	419.1	1375	32										71.3434					1.43103	33.431						74.7579
	300/A-476130-11715/0	PROVIDENCE A-47	504.444	1655		26.67									48.7071					1.57762		28.2476					51.8345
Kakisa
	300/K-10-6040-11715/0	CALSTAN TATHLINA LAKE K-10	853	2798.56		33	-2.63396	10.8646	6.556	7.921	30.366	39.0359	39.556	40.921	36.2251	33.1372	43.3011	43.9109	45.5111	2.07501			32.4411	41.1109	41.631	42.996		35.5698	45.7337	46.3435	47.9437
	300/D-39-6040-11715/0	SOBC TATHLINA LAKE D-39	980.2	3215.88		33	-0.856807	12.5365	8.0824	10.0834	32.1432	39.9647	41.0824	43.0834	31.5242	30.6501	38.6296	39.7698	41.8113	2.20761			34.3508	42.1724	43.29	45.291		32.9023	40.8818	42.022	44.0635
	300/G-19-6040-11745/0	BRIGGS WEST TATHLINA NO.2(G-19)	1047	3435.04		35	0.0460895	13.4	8.884	11.219	35.0461	42.4444	43.884	46.219	31.4231	31.4671	38.5334	39.9083	42.1385	2.26785			37.3139	44.7123	46.1518	48.4868		33.6332	40.6994	42.0744	44.3045
	300/G-48-6040-11745/0	BRIGGS WEST TATHLINA LAKE NO.1(G-48)	990.6	3250		33	-0.714861	12.6717	8.2072	10.2602	32.2851	40.0398	41.2072	43.2602	31.1932	30.4716	38.2998	39.4783	41.5508	2.21741			34.5025	42.2572	43.4246	45.4776		32.71	40.5383	41.7167	43.7892
	300/K-48-6040-11745/0	PLACID WOOD W. TATHLINA K-48	1009.2	3311.02		30	-0.462261	12.9127	8.4304	10.5764	29.5377	37.1737	38.4304	40.5764	27.6457	27.1876	34.754	35.9992	38.1256	2.23455			31.7723	39.4083	40.665	42.811		29.4018	36.9682	38.2134	40.3398
	300/K-18-6050-11715/0	BRIGGS N.E.TATHLINA LAKE NO.2(K-18)	750.1	2460.96		34	-4.12713	9.48746	5.3212	6.1717	29.8729	39.2708	39.3212	40.1717	42.5277	37.0256	49.5545	49.6217	50.7555	1.94992			31.8228	41.2207	41.2711	42.1216		39.6251	52.154	52.2212	53.3551
	300/D-34-6050-11715/0	BRIGGS NORTHEAST TATHLINA LAKE NO.9(D-34)	892.5	2928.15		31	-2.07397	11.3875	7.03	8.5925	28.926	37.3264	38.03	39.5925	32.381	30.0572	39.4693	40.2577	42.0084	2.11871			31.0447	39.4451	40.1487	41.7112		32.4311	41.8433	42.6316	44.3823
	300/J-53-6050-11715/0	BRIGGS TATHLINA LAKE NO.7(J-53)	843	2765.75		37	-2.77689	10.7316	6.436	7.751	34.2231	42.962	43.436	44.751	41.3998	38.1057	48.4722	49.0344	50.5943	2.06358			36.2867	45.0256	45.4996	46.8146		40.5536	50.9201	51.4823	53.0422
	300/J-65-6050-11715/0	PLACID CHEVRON KAKISA J-65	926.9	3041.01		36	-1.59224	11.8402	7.4428	9.1773	34.4078	42.5779	43.4428	45.1773	36.5735	34.8557	43.6702	44.6033	46.4746	2.15491			36.5627	44.7328	45.5977	47.3322		37.1806	45.9951	46.9282	48.7994
	300/F-01-6050-11730/0	BRIGGS TATHLINA LAKE NO.3(F-01)	811.4	2662.07		45	-3.23163	10.3103	6.0568	7.2138	41.7684	50.728	51.0568	52.2138	52.8716	48.8888	59.9309	60.3362	61.7621	2.02645			43.7948	52.7544	53.0833	54.2403		51.3863	62.4284	62.8337	64.2596
	300/A-71-6050-11730/0	BRIGGS W.TATHLINA LAKE NO.3(A-71)	1040	3412.07		32	-0.0475438	13.31	8.8	11.1	31.9525	39.3944	40.8	43.1	28.75	28.7043	35.86	37.2115	39.4231	2.26184			34.2143	41.6563	43.0618	45.3618		30.8791	38.0349	39.3864	41.5979
	300/F-35-6100-11715/0	PAN AMERICAN-SHELL KAKISA F-35	730	2395.01		29	-4.4246	9.2161	5.08	5.83	24.5754	34.1201	34.08	34.83	36.8493	30.7882	43.8631	43.8082	44.8356	1.92348			26.4989	36.0435	36.0035	36.7535		33.4231	46.498	46.4431	47.4705
	300/H-36-6100-11715/0	PAN AMERICAN-SHELL KAKISA H-36	762.5	2501.64		30	-3.94456	9.6545	5.47	6.3825	26.0554	35.3636	35.47	36.3825	36.5902	31.417	43.6244	43.7639	44.9607	1.9659			28.0213	37.3295	37.4359	38.3484		33.9952	46.2026	46.3422	47.5389
	300/L-19-6100-11800/0	PAN AMERICAN-SHELL KAKISA L-19	743	2437.66		28	-4.23199	9.39169	5.236	6.051	23.768	33.2176	33.236	34.051	34.8587	29.1629	41.881	41.9058	43.0027	1.94066			25.7087	35.1583	35.1767	35.9917		31.7748	44.493	44.5177	45.6146
	300/D-50-6050-11700/0	PLACID CHEVRON N.E. TATHLINA D-50	808.2	2651.57	37										43.1824					2.02261	39.0226						45.685
	300/I-44-6100-11715/0	PAN AMERICAN-SHELL KAKISA I-44	784.5	2573.82	28										33.0147					1.99362	29.9936						35.5559
	300/K-24-6040-11800/0	CPOG CHEVRON TATHLINA K-24	1051.9	3451.12	40										36.03					2.27201	42.272						38.1899
	300/C-126110-11715/0	MILLS LAKE C-12	673.61	2210.01	37.2										52.1073					1.84548	39.0455						54.847
	300/L-716050-11730/0	KAKISA L-71	940.918	3087	37.78										37.9204					2.16916	39.9492						40.2258
	300/F-466050-11800/0	GULL CREEK F-46	932.993	3061	33.3										33.4408					2.16114	35.4611						35.7571
	300/A-636050-11800/0	GULL CREEK A-63	916.838	3008	42.2										43.7373					2.1445	44.3445						46.0763
Hay River
	300/B-52-6100-11530/0	HORN RIVER ET AL HAY RIVER B-52	617.8	2026.9	28										41.923					1.76257	29.7626						44.7759
	300/G-15-6100-11615/0	GEN. CRUDE RANVIK REEF CREEK G-15	363.6	1192.91	19										46.4796					1.34065	20.3407						50.1668
	300/I-41-6100-11630/0	NWT HEART LAKE NO.2 (I-41)	502.6	1648.95	42										79.3872					1.57447	43.5745						82.5198
	300/E-72-6110-11615/0	GEN. CRUDE RANVIK CHEVRON DESMARAIS PT. E-72	470.3	1542.98	26										50.8186					1.51892	27.5189						54.0483
	300/G-386100-11630/0	DESMARAIS NO.1 (G-38)	512.67	1681.99	33.3										60.8579					1.59164	34.8916						63.9625
Enterprise
	300/J-72-6030-11530/0	SHELL H.B. GRUMBLER J-72	730.3	2396		28	-4.42014	9.22016	5.0836	5.8351	23.5799	33.1223	33.0836	33.8351	35.4649	29.4124	42.4789	42.4259	43.4549	1.92388			25.5037	35.0462	35.0075	35.759		33.573	45.1132	45.0602	46.0892
	302/L-66-6040-11600/0	NWT ESCARPMENT LAKE NO.1(L-66)	635.5	2084.97		27	-5.84853	7.93067	3.946	4.2235	21.1515	31.4059	30.946	31.2235	39.1817	29.9787	46.1148	45.391	45.8277	1.78949			22.941	33.1954	32.7355	33.013		32.7946	44.6068	48.2069	48.6436
	300/A-77-6040-11600/0	NWT ESCARPMENT LAKE NO.3(A-77)	472.4	1549.87		34									67.5275					1.52255		35.5225					70.7505
	300/J-26-6020-11630/0	MURPHY-CANADA ALEXANDRA FALLS NO.2(J-26)	855.3		31										33.7893					2.07762	33.0776						36.2184
	300/M-05-6020-11815/0	SUNCOR N CAMERON HILLS M-05	1424.9		56										37.8272					2.48213	58.4821						39.5692
	300/I-72-6030-11530/0	GRUNBLER I-72	402.95	1322.01	17.2										37.4736					1.40391	18.6039						40.9577
	300/I-166030-11545/0	GRUNBLER I-16	540.106	1772	32.78										56.8037					1.63786	34.4179						59.8362

## Sheet: Cameron Hills well
Well Short Name	Formations	Top	Base	Lithology	Thickness	Measured Temperature at the top	Paleoclimate temperature correction	Measured Temperature with Paleo cor	λ per formation	GR	A	A	Qo	Geothermal gradient without Paleoclimate correction	Ts	Calculated temperature Tz
		(m)	(m)		(m)	(°C)	(°C)	(°C)	(W/mK)	(API)	(uWm-3)	(Wm-3)	(Wm2)	(°C/km)	(°C)	(°C)
A-73
	Wabamun	443	809	Dolomitic limestone	366	20.15	1.47184	21.6218	3.4	49.0007	0.63801	6.3801e-07	0.104144	39.1969	20.15	31.0283
	TwinFalls	809	1022	Limestone	213	29.7189	2.02357	31.7425	2.5	34.5901	0.429056	4.29056e-07				39.8974
	Muskwa	1022	1283	Organic-rich shale	261	37.1041	2.24606	39.3502	2.1	23.4695	0.267808	2.67808e-07				52.8367
	Waterways	1283	1304	shale	21	51.2829	2.42731	53.7102	2.1	11.1635	0.0893714	8.93714e-08				53.8781
	Slave Point	1304		Limestone		52.3272	2.43737	54.7646
	Total thickness				861
	Total Harmonic average								2.63196
	Total Arithmetic weigted average											4.60715e-07
E-07
	CB SS	461.4	471.9	Sandstone	10.5	21.5434	1.57762	23.121	3.4	30.7236	0.372992	3.72992e-07	0.113792	43.7129	21.5434	21.8948
	Wabamun	471.9	760	Dolomitic limestone	288.1	21.8731	1.50356	23.3767	3.4	32.4944	0.398668	3.98668e-07				31.2568
	TwinFalls	760	912.5	Limestone	152.5	31.8469	1.52168	33.3686	2.5	31.7611	0.388035	3.88035e-07				38.1964
	Hay River	912.5	1204.6	Shale	292.1	37	1.9627	38.9627	2.1	60.5502	0.805477	8.05477e-07				54.008
	Beaverhill Lake	1204.6		Anhydrite and Limestone		54.5	2.13996	56.64
	Total thickness				743.2
	Total Harmonic average								2.58128
	Total Arithmetic weigted average											5.56012e-07
I10
	CB SS	575.1	590.3	Sanstone	15.2	24.6022	1.7	26.3022	3.4	49.8369	0.650135	3.8388e-07	0.0806215	35.3951	24.6022	24.9626
	Wabamun	590.3	622	Dolomitic limestone	31.7	25.0852	1.75334	26.8385	3.4	17.9356	0.187566	1.87566e-07				25.6928
	Trout River	622	627.9	Limestone	5.9	25.9237	1.80069	27.7244	2.5	15.1139	0.146651	1.46651e-07				25.9193
	Kakisa	627.9	665.8	Limestone	37.9	26.0411	1.79165	27.8328	2.5	16.7373	0.170191	1.70191e-07				26.9378
	Redknife	665.8	715	Shale	49.2	26.9155	1.85715	28.7727	2.1	57.7604	0.765026	7.65026e-07				28.8262
	Tathlina	715	868.3	Shale	153.3	28	1.92637	29.9264	2.1	35.0999	0.436449	4.36449e-07				34.7091
	Twin Falls	868.3	999.5	Limestone	131.2	34.4927	2.1151	36.6078	2.5	27.6038	0.327755	3.27755e-07				38.939
	Hay River	999.5	1270.2	Shale	270.7	37.4023	2.2474	39.6497	2.1	50.4587	0.659151	6.59151e-07				49.32
	Slave Point	1270.2		Limestone		49.4296	2.43584	51.8654
	Total thickness				695.1
	Total Harmonic average								2.28111
	Total Arithmetic weigted average											4.96442e-07
I74
	CB SS	539.7	554.6	Sandstone	14.9	21.2633	1.57762	22.8409	3.4	33.4493	0.412514	4.12514e-07	0.105719	42.5093	21.7133	21.7266
	Wabamun	554.6	717.6	Dolomitic limestone	163	21.8932	1.68366	23.5769	3.4	17.0242	0.17435	1.7435e-07				26.6494
	Fort Simpson	717.6	829.1	Limestone	111.5	25.9003	1.9299	27.8302	3	39.2118	0.49607	4.9607e-07				30.5776
	Twin Falls	829.1	898.8	Limestone	69.7	30.7866	2.07047	32.8571	2.5	20.4356	0.223816	2.23816e-07				33.5249
	Hay River	898.8	1282	Shale	383.2	32.9372	2.14819	35.0854	2.1	44.539	0.573316	5.73316e-07				52.7961
	Waterways	1282		Shale		52.4739	2.44138	54.9153
	Total thickness				742.3
	Total Harmonic average								2.48696
	Total Arithmetic weigted average											4.3806e-07
L-44
	CB SS	516.8	528.2	Sandstone	11.4	15.1327	1.59866	16.7314	3.4	32.9849	0.405781	4.05781e-07	0.102498	37.7916	15.1327	15.4764
	Wabamun	528.2	855	Dolomitic limestone	326.8	15.4417	1.61792	17.0596	3.4	30.6206	0.371499	3.71499e-07				25.041
	Twin Falls	855	1022	Limestone	167	24.7414	2.07728	26.8187	2.5	40.5604	0.515626	5.15626e-07				31.885
	Hay River	1022	1305.2	Shale	283.2	29.8642	2.24606	32.1103	2.1	70.8407	0.95469	9.5469e-07				45.6893
	Beaverhill Lake	1305.2	1361.7	Anhydrite and Limestone	56.5	44.2075	2.43792	46.6454	4.3	68.3	0.91785	9.1785e-07				47.0358
	Slave Point	1361.7		Limestone		46.8582	2.46151
	Total thickness				844.9
	Total Harmonic average								2.71218
	Total Arithmetic weigted average											6.32463e-07
M49
	CB SS	471.6	478.1	Sandstone	6.5	20.8525	1.52116	22.3737	3.5	33.0531	0.406769	4.06769e-07	0.115762	43.4575	20.8525	21.0738
	Wabanum	478.1	696.5	Dolomitic limestone	218.4	21.3946	1.5407	22.9353	3.4	33.0531	0.406769	4.06769e-07				28.2946
	Ft. Simpson	696.5	812.8	Limestone	116.3	26.4235	1.55215	27.9757	3	33.0531	0.406769	4.06769e-07				32.7814
	Twin Falls	812.8	961.9	Limestone	149.1	31.6932	1.90087	33.5941	2.5	20.2098	0.220542	2.20542e-07				39.6845
	Hay River	961.9	1252.6	Shale	290.7	36.3915	2.0512	38.4427	2.1	46.5181	0.602012	6.02012e-07				55.6971
	Beaverhill Lake	1252.6	1301.9	Anhydrite and carbonates	49.3	52.6582	2.21215	54.8704	4.3	32.1927	0.394294	3.94294e-07				57.0242
	Slave Point	1301.9	1331.8	Limestone	29.9	54.7934	2.42715	57.2206	2.9	60.5113	0.804913	8.04913e-07				58.2177
	Ft. Vermilion	1331.8		Anhydrite		55.6228	2.45021	58.073
	Total thickness				860.2
	Total Harmonic average
	Total Arithmetic weigted average								2.6638			4.53596e-07

## Sheet: Temperature_prediction
Community	Formations	(z) Top Depth	(z) Base Depth	Thickness per formation	Thickness per formation	λ per formation	A	A Arithmetic weigted average per formation	Qo	Geothermal gradient without Paleoclimate	Ts	Calculated temperature Tz
		(m)	(m)	(m)	(%)	W/mK	uW/m3	W/m3	Wm2	°C/km	°C	°C
Ft.Providence
	Alluvium	0	20	20	3.80952	1.4	1.7	1.7e-06	0.124201	52.6	2.13615	3.91021
	Hay River (Escarpement member)	20	260	240	45.7143	2.1	0.496	4.96e-07				18.0978
	Waterways member	260	300	40	7.61905	2.2	0.394	3.94e-07				20.3558
	Horn River	300	410	110	20.9524	2.1	0.513	5.13e-07				26.8601
	Lonely Bay	410	480	70	13.3333	3	0.15	1.5e-07				29.758
	Headless	480	505	25	4.7619	2.3	0.339	3.39e-07				31.108
	La Loche (Red Beds)	505	524	19	3.61905	3.4	0.73	7.3e-07				31.802
	Basal Clastics	524	525	1	0.190476	3.4	0.73	7.3e-07				31.8386
	Precambrian	525				3
	Total thickness			525
	Total Harmonic average					2.36123
	Total Arithmetic weigted average						0.492962	4.92962e-07
Kakisa
	Alluvium	0	15	15	2.05761	1.4	1.7	1.7e-06	0.0992015	42.5	2.13615	3.19889
	Twin Falls	15	145	130	17.8326	2.5	0.207	2.07e-07				8.35666
	Hay River (Escarpement member)	145	490	345	47.3251	2.1	0.496	4.96e-07				24.64
	Waterways member	490	511	21	2.88066	2.2	0.394	3.94e-07				25.5869
	Slave Point	511	573	62	8.5048	2.9	0.2472	2.472e-07				27.7076
	Watt Mountain	573	575	2	0.274348	2.2	0.4971	4.971e-07				27.7978
	Sulphur Point	575	633	58	7.9561	3.5	0.155	1.55e-07				29.4416
	Horn River	633	683	50	6.85871	2.1	0.513	1.59453e-07				31.8034
	Chinchaga	683	709	26	3.56653	3.6	0.197041	1.97041e-07				32.5199
	La Loche (Basal clastic)	709	729	20	2.74348	3.4	0.73	7.3e-07				33.1034
	Precambrian	729				3
	Total thickness			729
	Total Harmonic average					2.33415
	Total Arithmetic weigted average						0.414935	4.14935e-07
Hay River
	Alluvium	0	10	10	1.62866	1.4	1.7	1.7e-06	0.151509	55.9	2.13615	3.2183
	Hay River (Escarpement member)	10	85	75	12.215	2.1	0.496	4.96e-07				8.62869
	Waterways member	85	115	30	4.88599	2.2	0.394	3.94e-07				10.6946
	Slave Point	115	185	70	11.4007	2.9	0.2472	2.472e-07				14.3516
	Watt Mountain	185	188	3	0.488599	2.2	0.4971	4.971e-07				14.5582
	Sulphur Point	188	238	50	8.14332	3.5	1	1e-06				16.7222
	Klua	238	303	65	10.5863	2.1	0.5232	5.232e-07				21.4113
	Keg River	303	378	75	12.215	3	0	0				25.199
	Chinchaga	378	443	65	10.5863	3.6	0.197041	1.97041e-07				27.9345
	Chinchanga (Ebbutt Member)	443	452	9	1.4658	2.2	0.466	2.46454e-06				28.5543
	Mirage Point	452	492	40	6.51466	2.6	0.3533	3.533e-07				30.8851
	Mirage Point (Ernestina Lake)	492	592	100	16.2866	3.3	0.1865	1.865e-07				35.476
	Basal Clastics	592	614	22	3.58306	3.4	0.73	7.3e-07				36.4563
	Precambrian	614				3
	Total thickness			614
	Total Harmonic average					2.71036
	Total Arithmetic weigted average						0.382194	3.82194e-07
Enterprise
	Alluvium	0	4	4	0.583942	1.4	1.7	1.7e-06	0.102832	41.5	2.13615	2.42995
	Hay River (Escarpement member)	4	202	198	28.9051	2.1	0.482255	4.82255e-07				12.1211
	Waterways member	202	404	202	29.4891	2.2	0.394	3.94e-07				21.5593
	Slave Point	404	460	56	8.17518	2.9	0.2472	2.472e-07				23.5449
	Watt Mountain	460	465	5	0.729927	2.2	0.4971	4.971e-07				23.7786
	Sulphur Point	465	525	60	8.75912	3.5	1	1e-06				25.5409
	Muskeg	525	565	40	5.83942	4.4	0.053	5.3e-08				26.4757
	Keg River	565	619.8	54.8	8	3	0.056148	5.6148e-08				28.3541
	Chinchaga	619.8	649.8	30	4.37956	3.6	0.197041	1.97041e-07				29.211
	Mirage Point	649.8	679.8	30	4.37956	2.6	0.347	3.47e-07				30.3975
	Basal Clastics	679.8	685	5.2	0.759124	3.4	0.73	7.3e-07				30.5547
	Precambrian	685				3
	Total thickness			685
	Total Harmonic average					2.47788
	Total Arithmetic weigted average						0.413894	4.13894e-07			28.6618
